# Supplementary material
Source: PubMed Central journal article supplement (PMC11386746)
Supplement: PBI-18-992-s005.pdf [file PBI-18-992-s005.pdf]

# Fresh seed dormancy

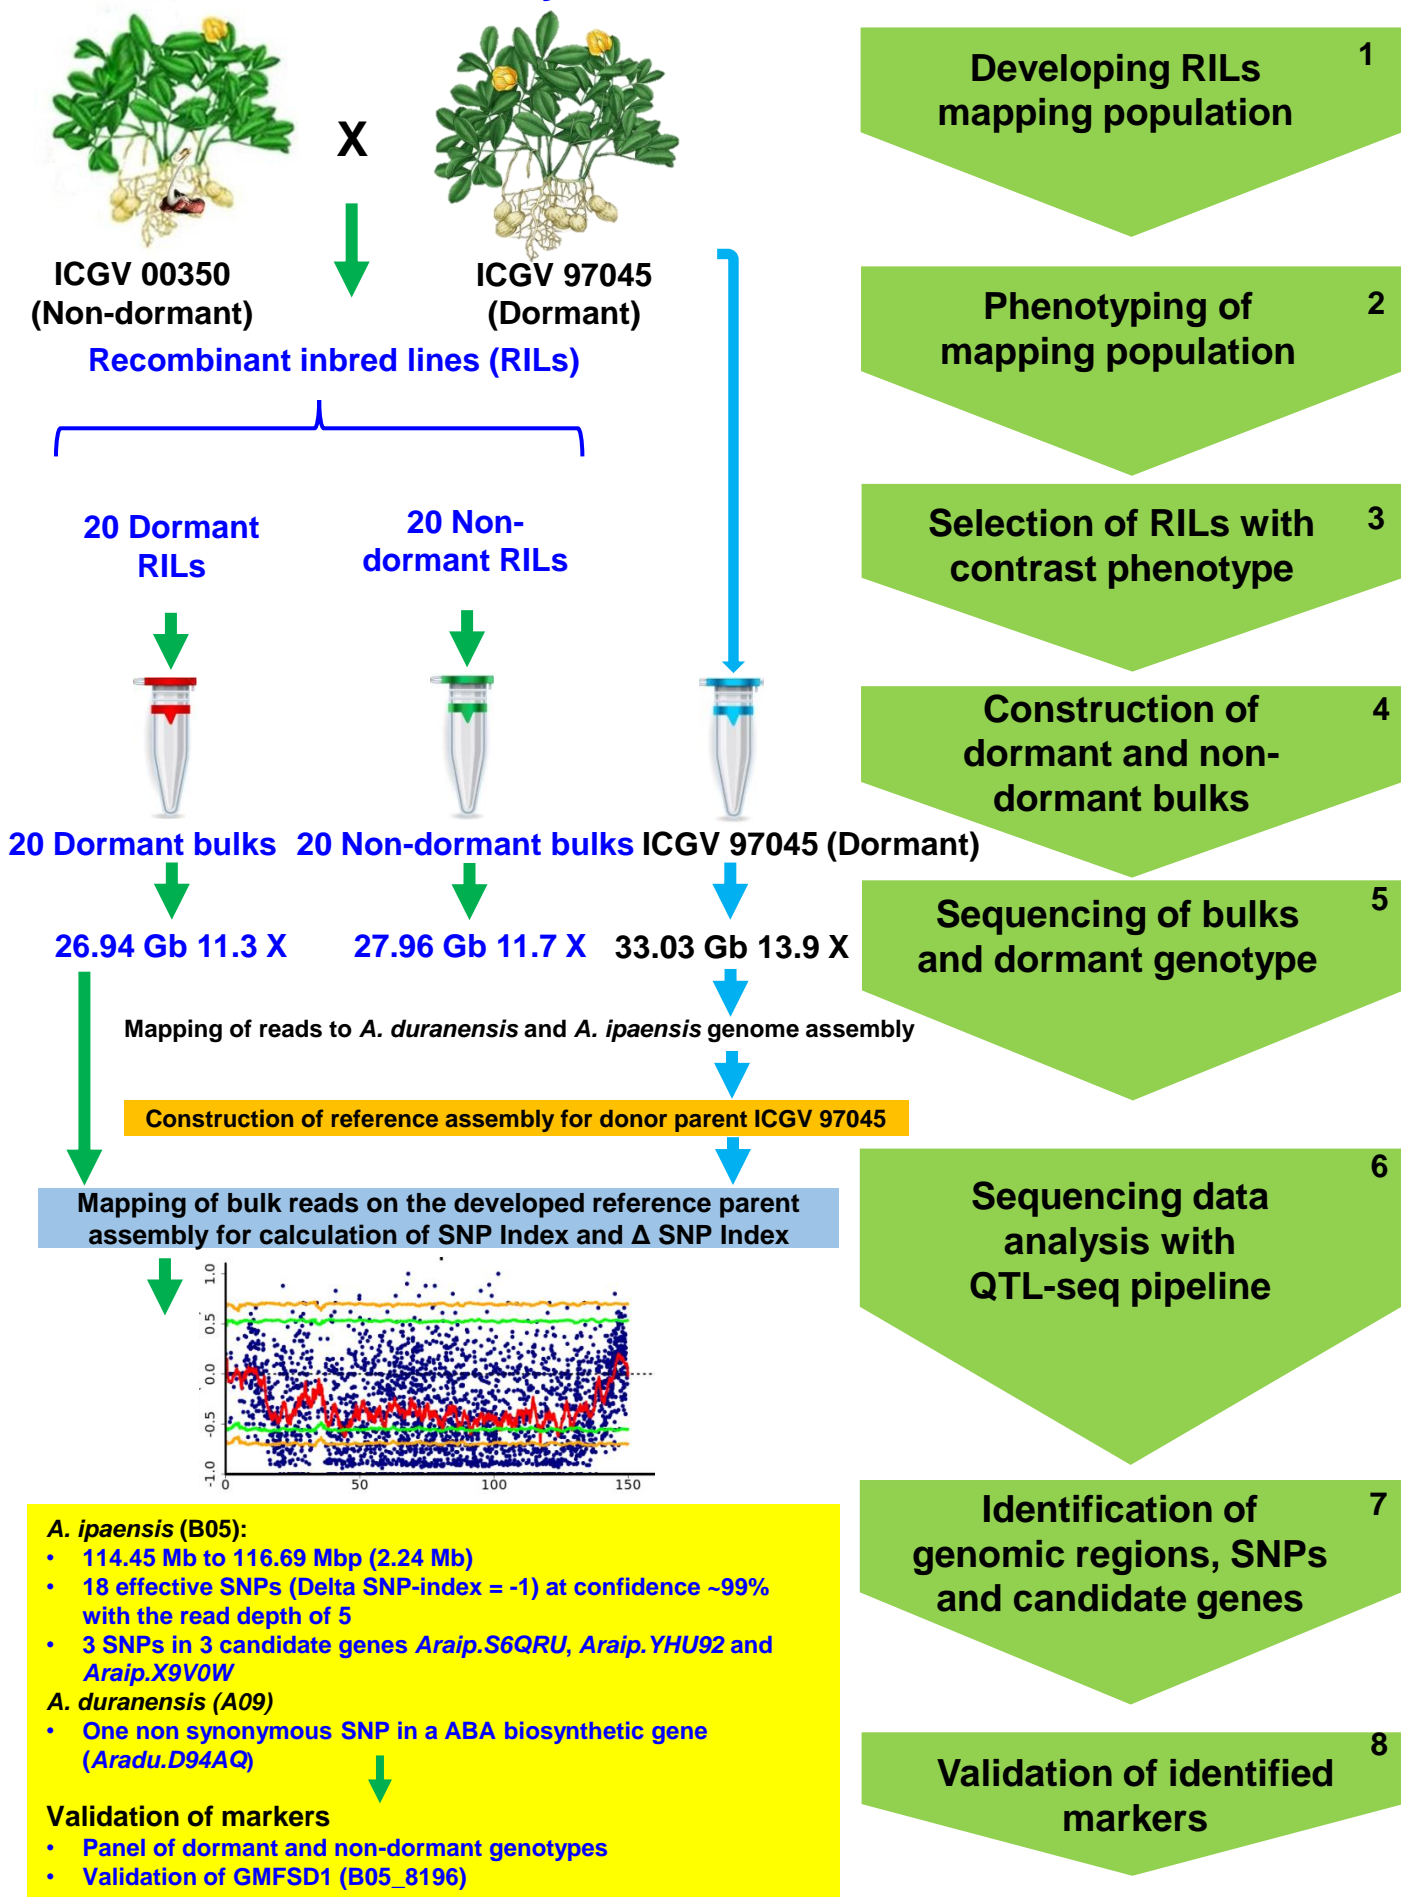

**Supplementary Figure S1.** QTL-seq approach used for trait mapping in groundnut for fresh seed dormancy

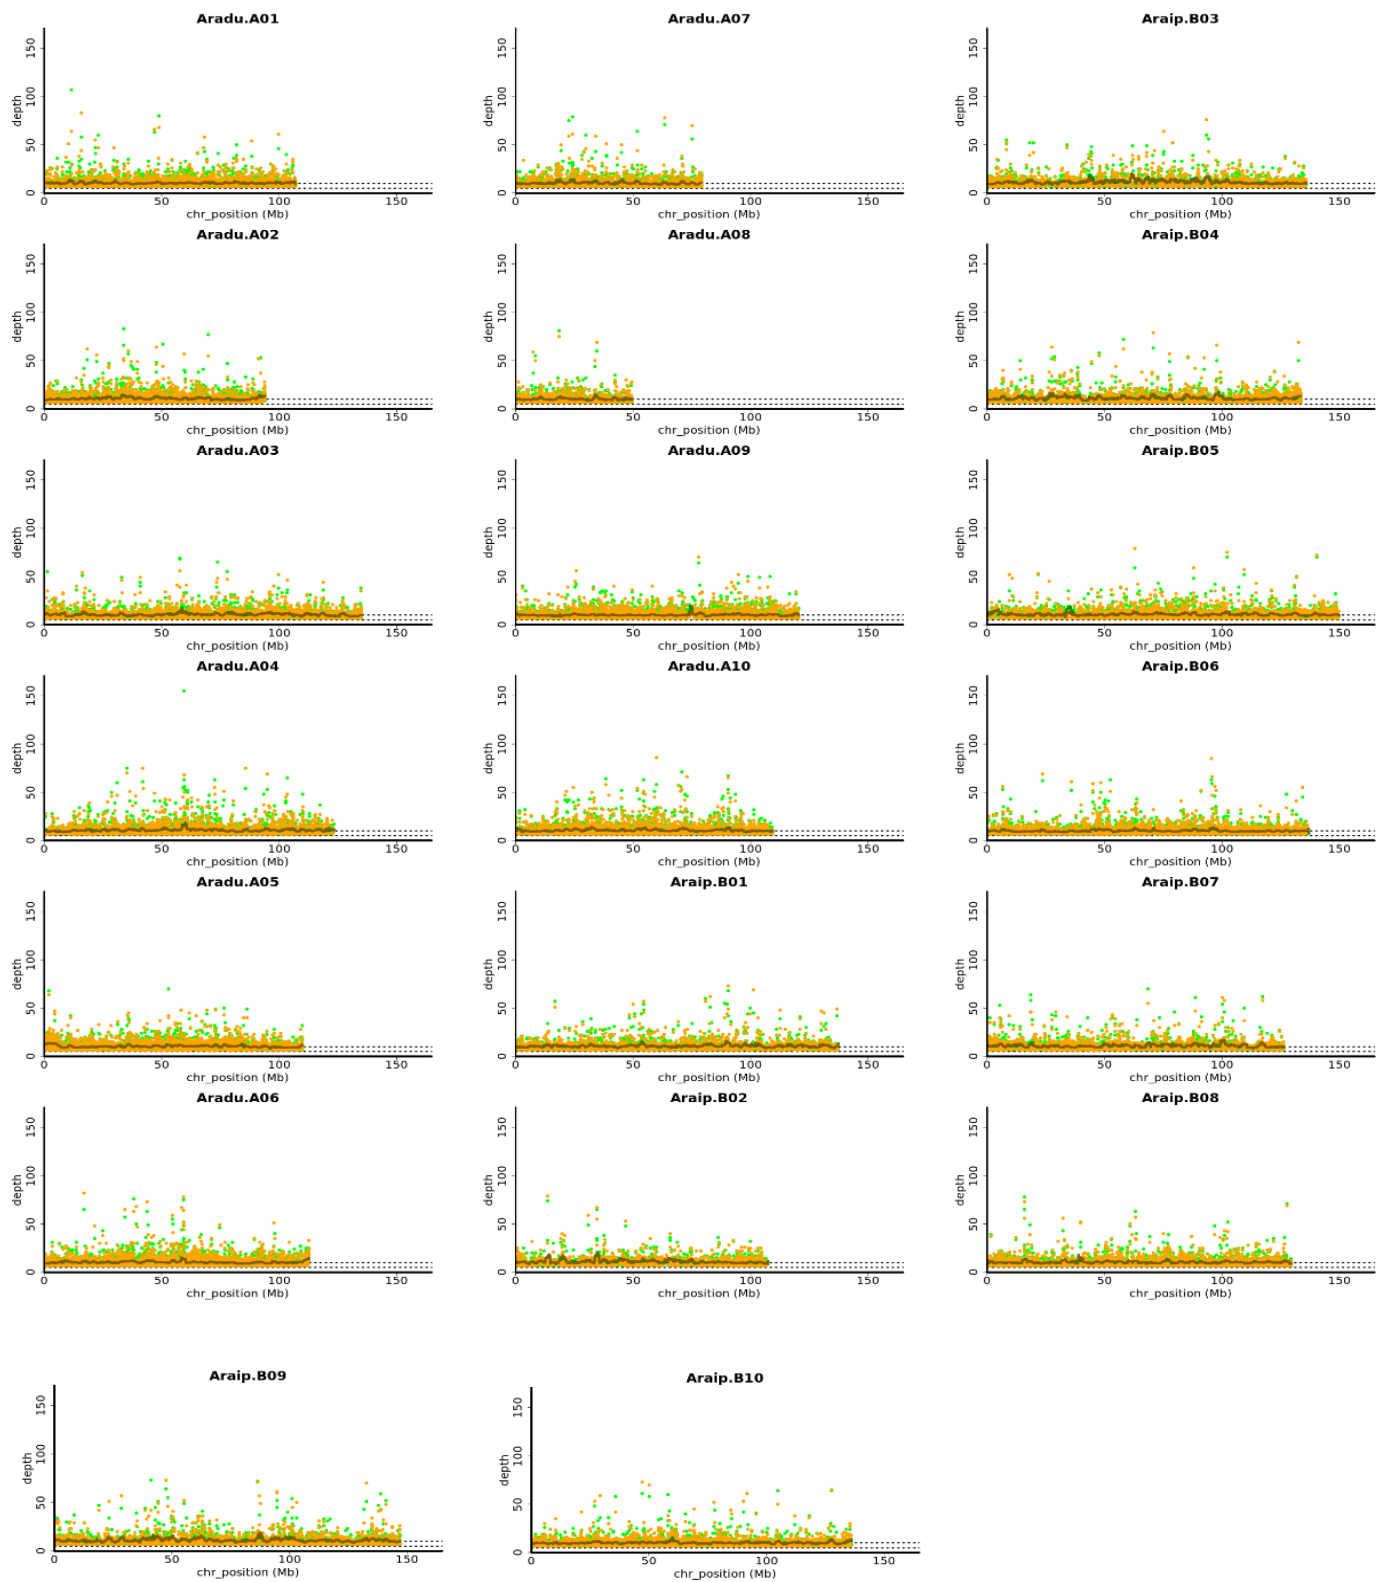

**Supplementary Figure S2.** Sequencing depth of the dormant parent ICGV 97045 Black line indicates the sliding window average of 2 Mb interval with 50 kb increment for SNP-index.

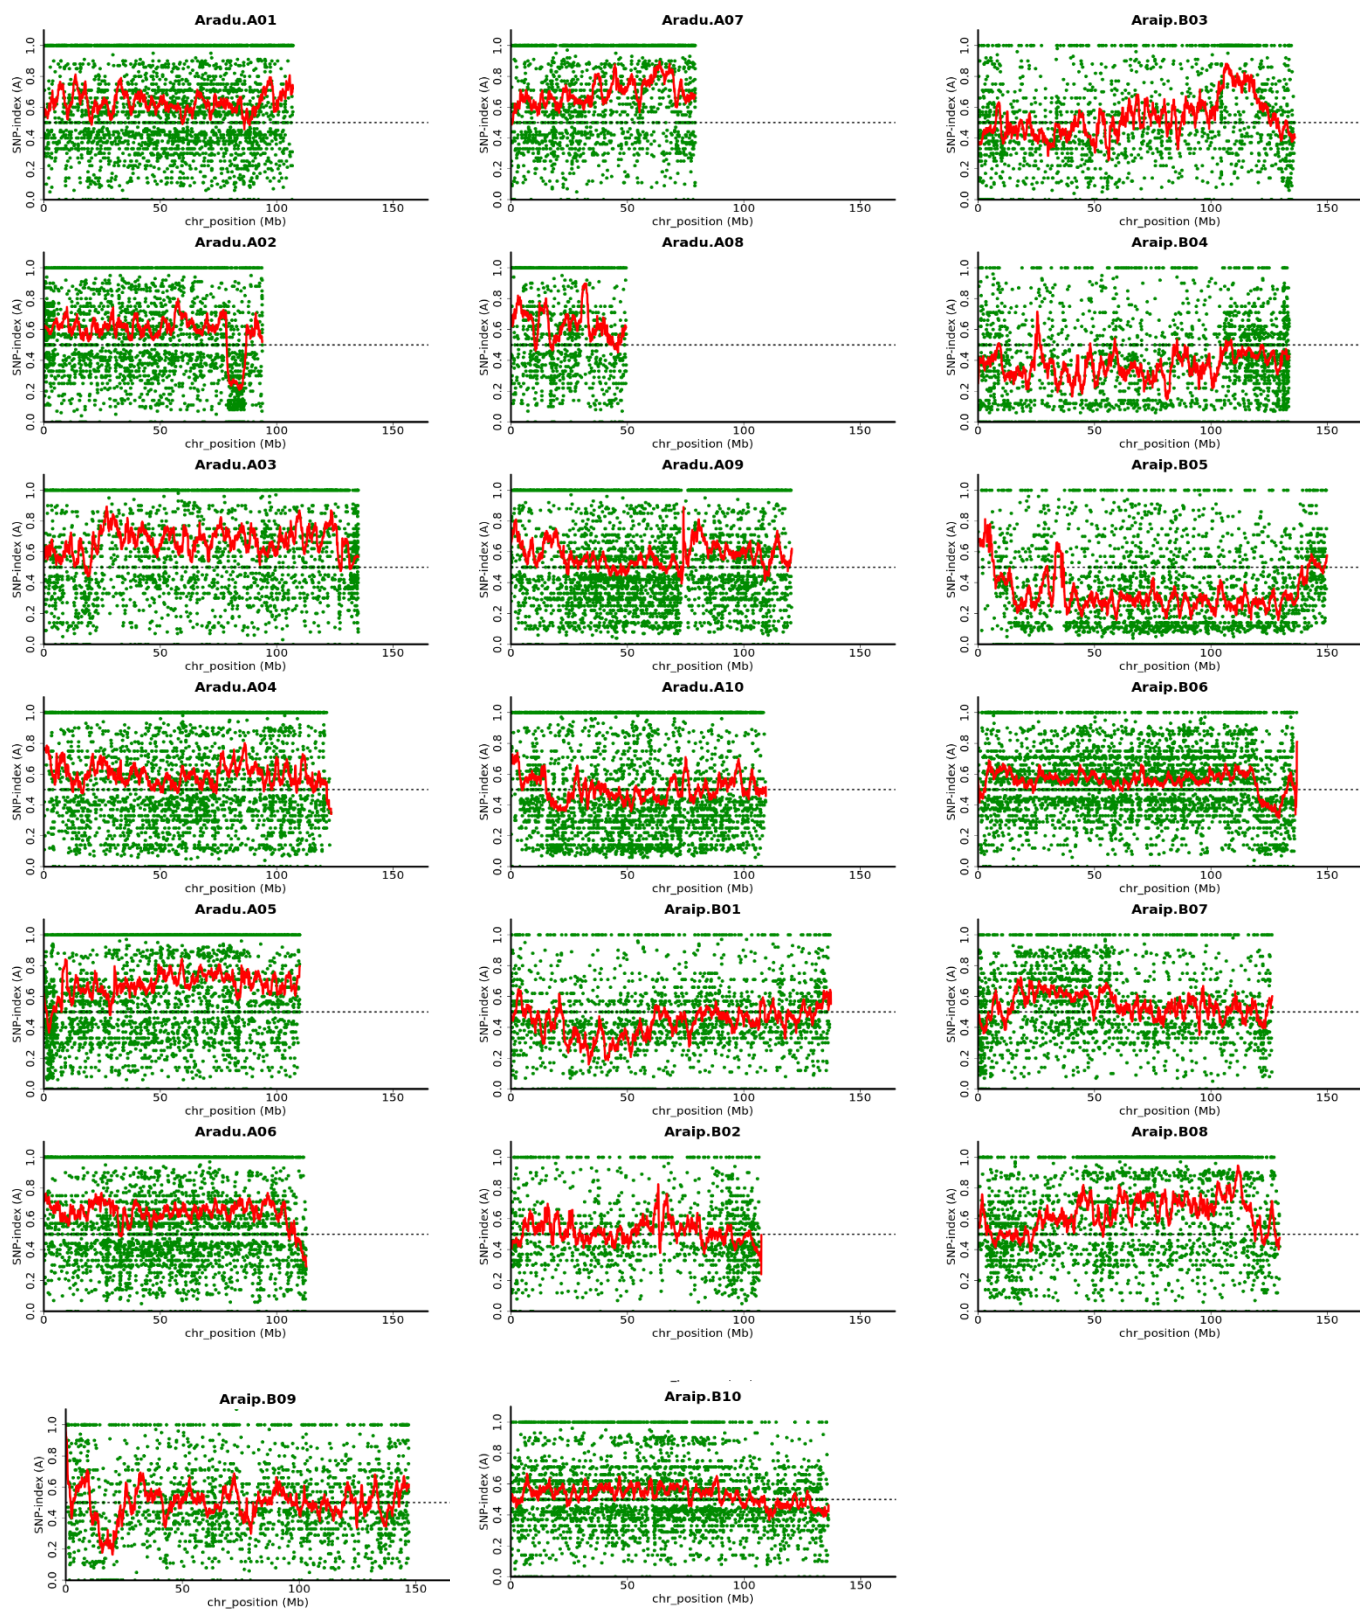

**Supplementary Figure S3.** SNP-index plots for 20 pseudomolecules Dormant pool with the dormant parent. Red lines indicate the sliding window average of 2 Mb interval with 50 kb increment for SNP-index.



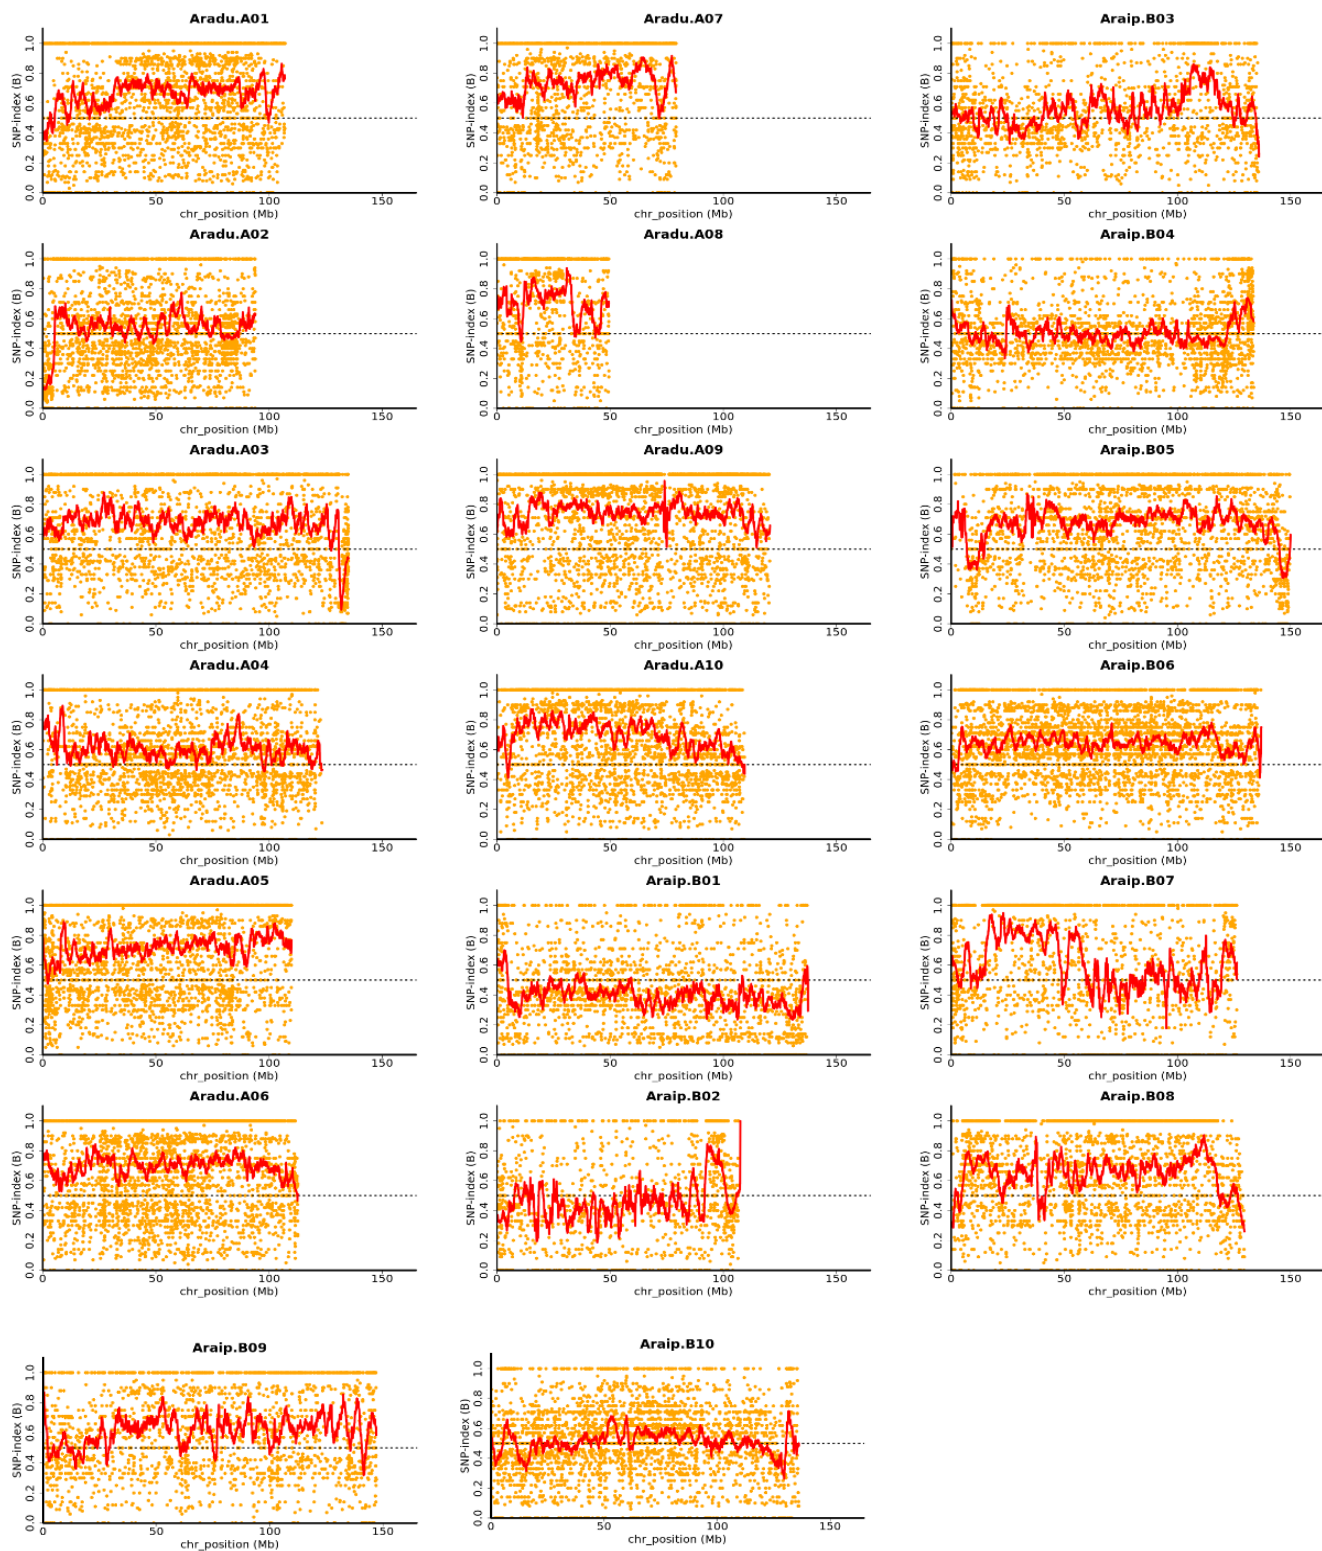

**Supplementary Figure S4.** SNP-index plots for 20 pseudomolecules of Non-dormant pool with dormant parent. Red lines indicate the sliding window average of 2Mb interval with 50 kb increment for SNP-index.

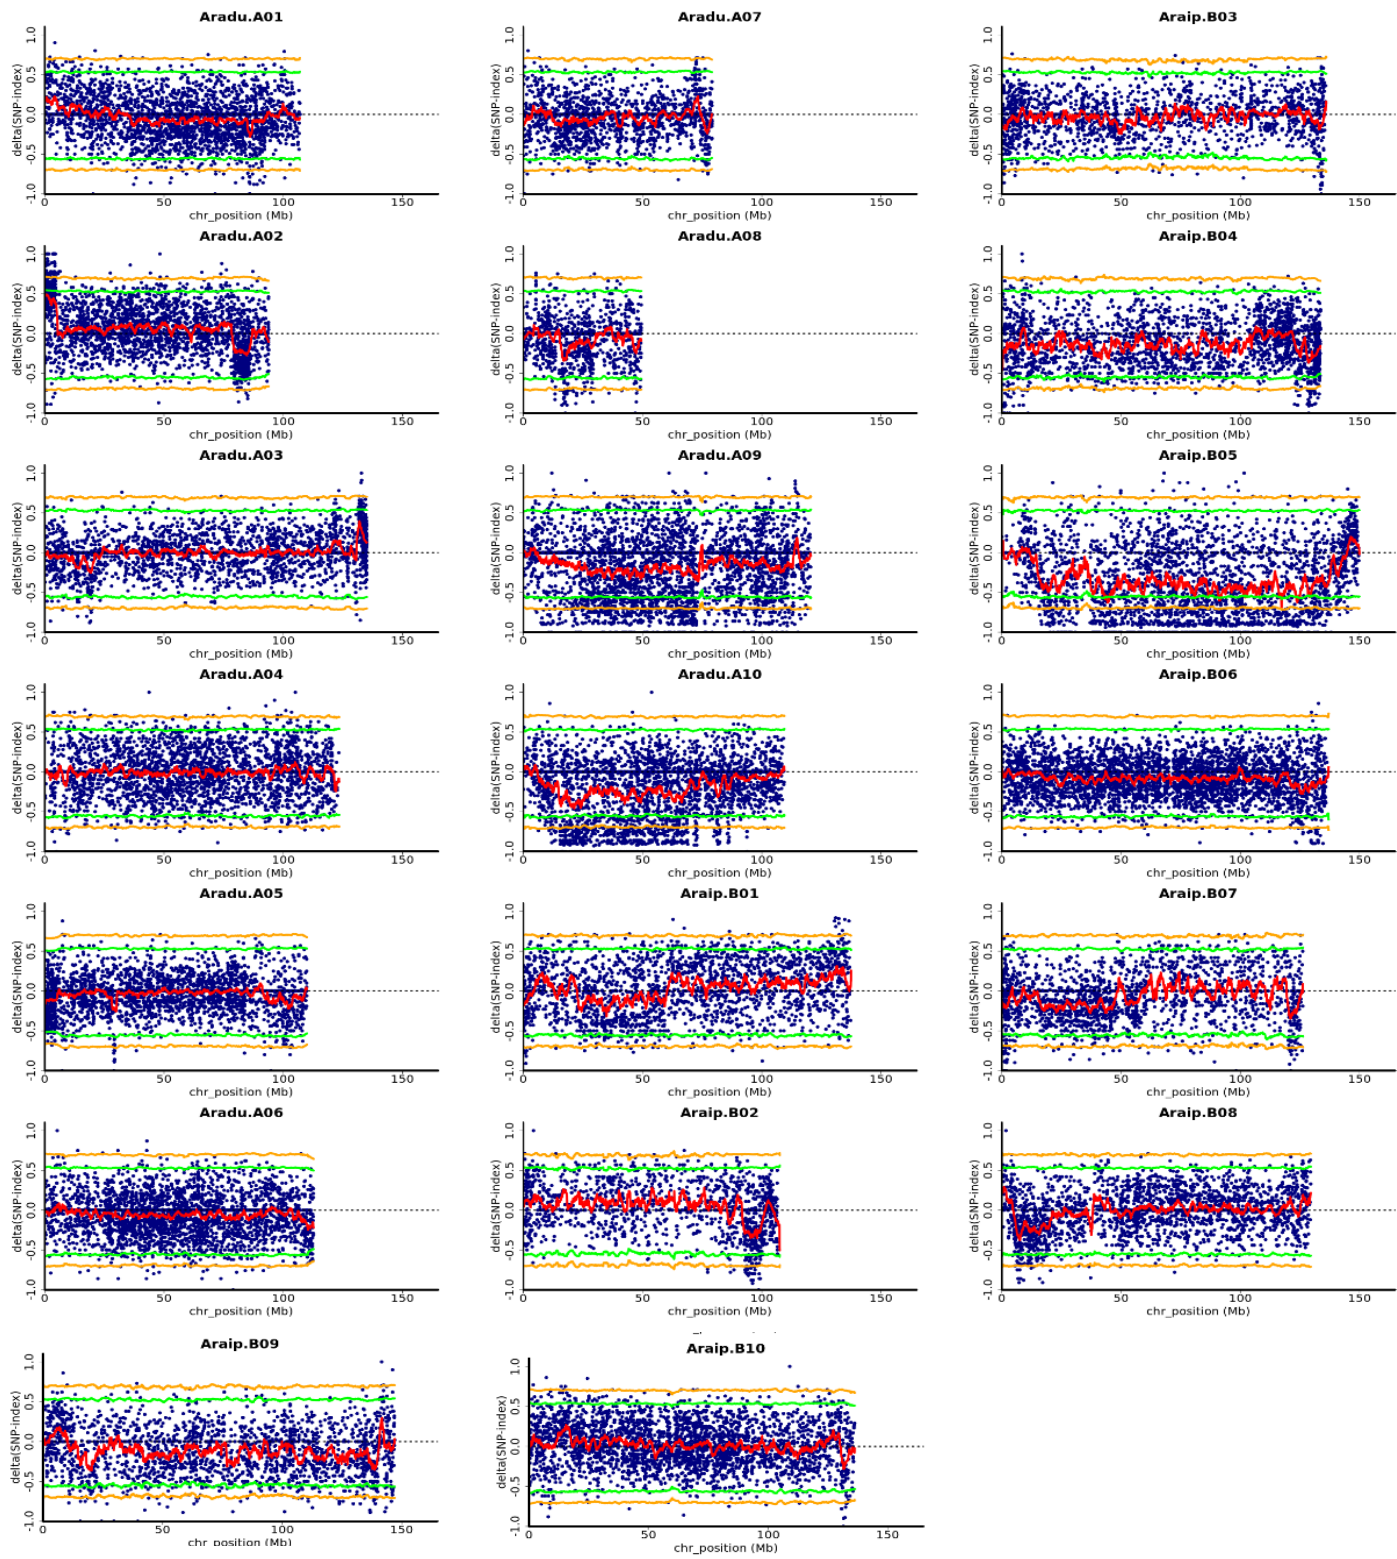

**Supplementary Figure S5.** The  $\Delta(\text{SNP index})$  plot obtained by subtraction of dormant pool SNP-index from non-dormant pool SNP-index. Statistical confidence intervals under the null hypothesis of no QTL are shown (gray:  $P < 0.1$ ; green:  $P < 0.05$ ; pink:  $P < 0.01$ ).
